# Supplementary material for: 25-Hydroxycholesterol amplifies microglial IL-1β production in an apoE isoform-dependent manner
Source: PubMed Central journal article supplement (PMC7298825; doi:10.1186/s12974-020-01869-3), 2020-06-17
Supplement: 12974_2020_1869_MOESM1_ESM.pdf [file 12974_2020_1869_MOESM1_ESM.pdf]

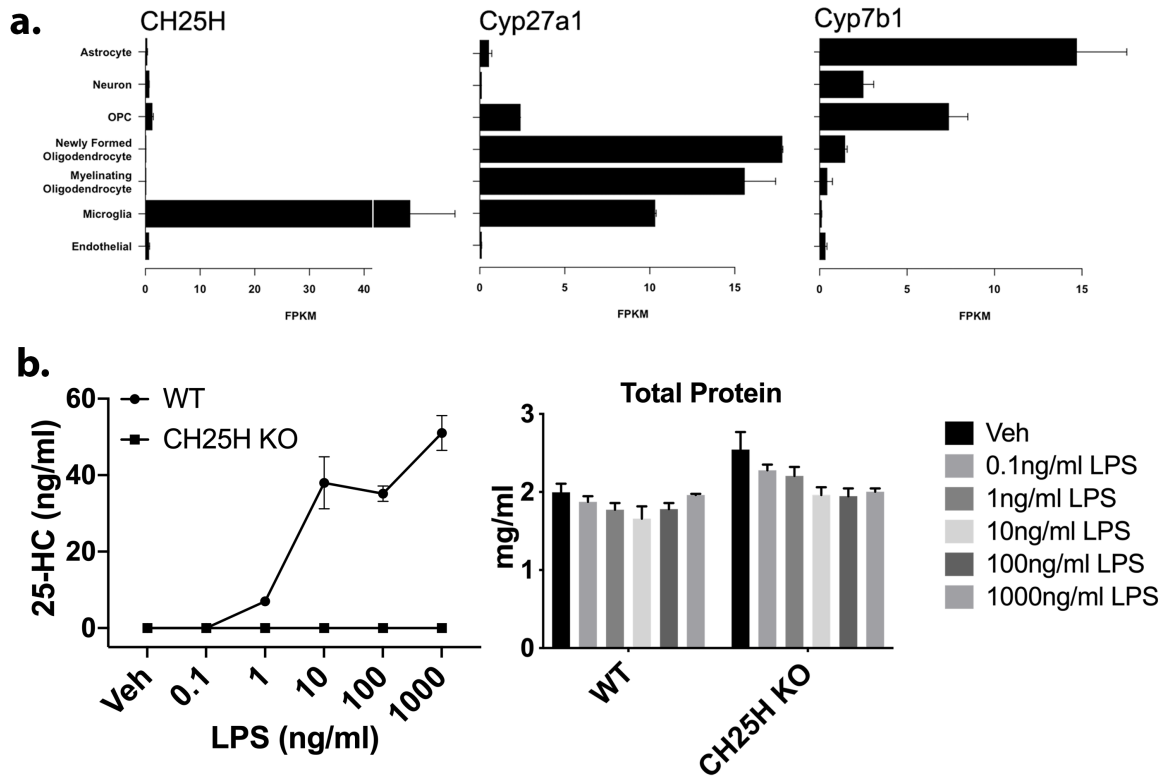

**Supplementary Figure 1.** a). Expression of CH25H, Cyp27a1 and Cyp7b1 in different cell types in brain based on the Stanford transcriptome database generated by Barres and colleagues (<http://www.brainmaseq.org>). b). GC-MS analysis of 25-HC levels in the conditioned medium (left) and total protein levels of cell lysate of primary mouse microglia from wild-type and CH25H<sup>-/-</sup> mice treated with LPS (0, 0.1, 1, 10, 100, 1000ng/ml).

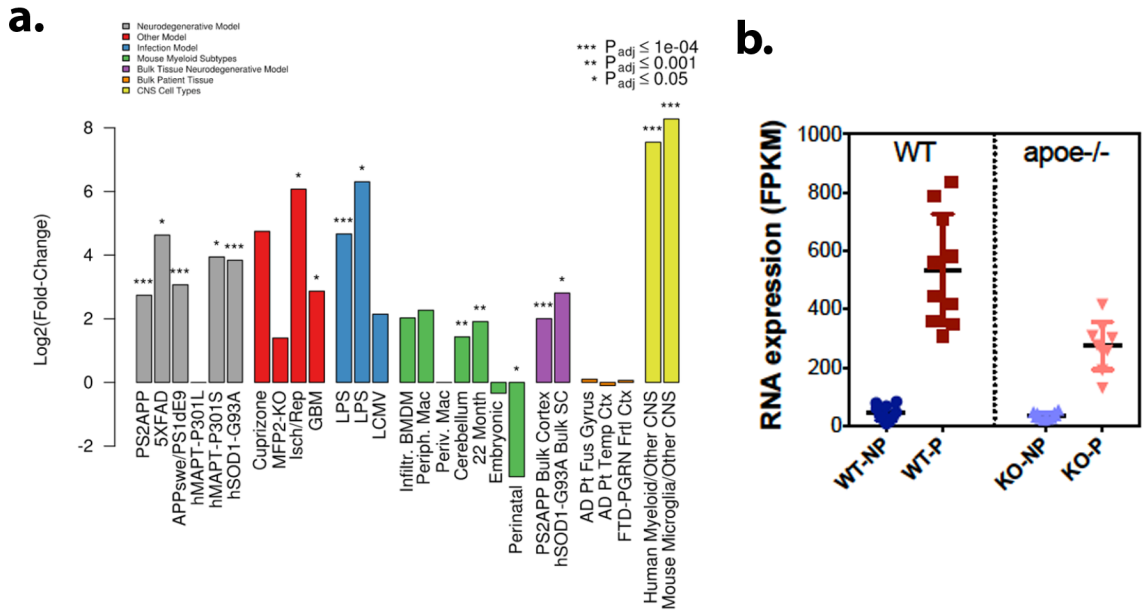

**Supplementary Figure 2a.** Differential expression of CH25H or its ortholog in a comparison within one of the datasets. Fold-Changes are relative to non-transgenic, untreated, normal, adult, cortical or parenchymal microglia as appropriate, or, for the last two comparisons, relative to non-myeloid CNS cells (Friedman, et al Cell Report, 2018) <http://research-pub.gene.com/BrainMyeloidLandscape>. **2b.** Relative CH25H gene expression in non-phagocytic (NP) and phagocytic (P) wild-type (WT) or *apoe*<sup>-/-</sup> (KO) microglia by RNA seq analysis data generated by Krasemann et al, (Immunity, 47:566, 2017).

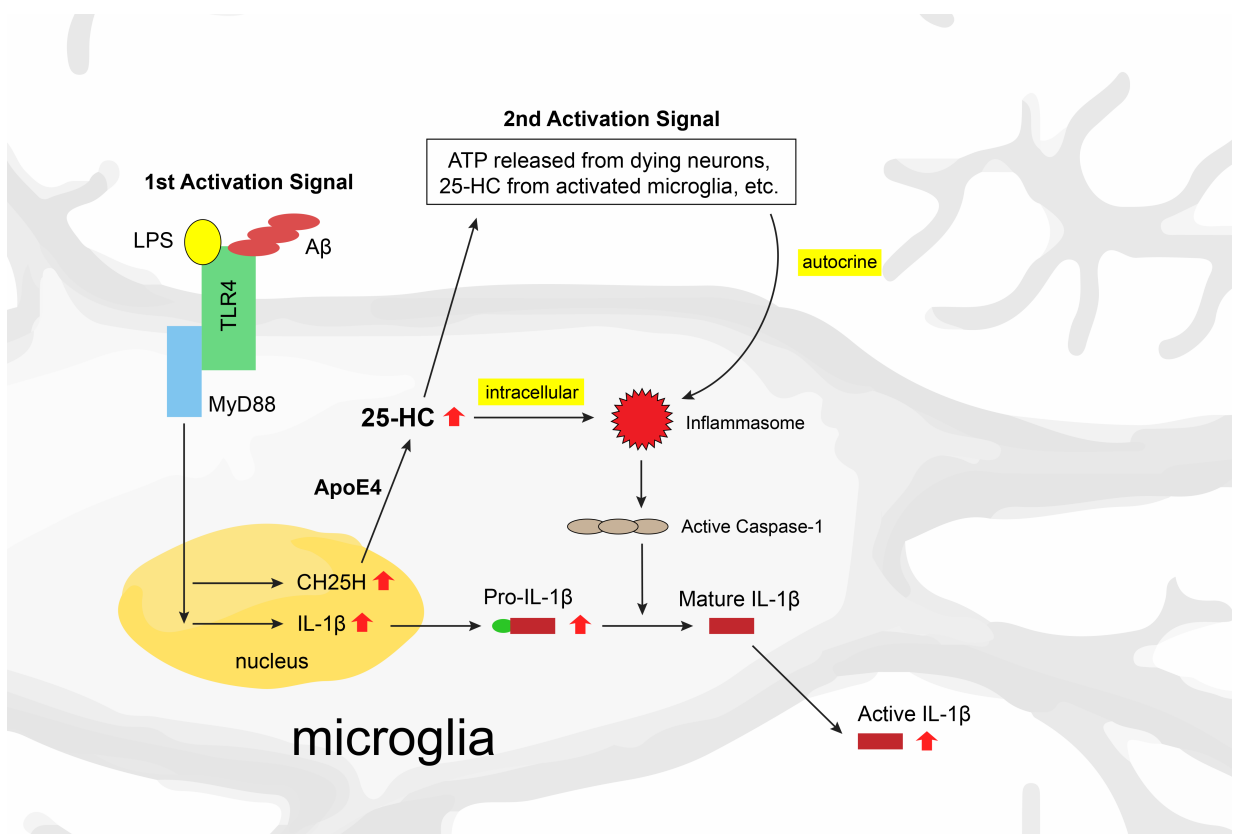

**Supplementary Figure 3.** A schematic diagram for the mechanism associated with 25-HC in amplifying IL-1 $\beta$  production via inflammasome activation.
